# Supplementary material
Source: PubMed Central journal article supplement (PMC7887877)
Supplement: JPPT_26_2_Abraham_S_Table_1.pdf [file JPPT_26_2_Abraham_S_Table_1.pdf]

**Table S1.** Theme 1: Perceptions of Prescription Opioids and Misuse

| Subthemes                                    | Verbatim Examples                                                                                                                                                                                                                                                                                                                                                                                                                                                                                                                                                                                                                                                                                                                                                                                                                                                                                    |
|----------------------------------------------|------------------------------------------------------------------------------------------------------------------------------------------------------------------------------------------------------------------------------------------------------------------------------------------------------------------------------------------------------------------------------------------------------------------------------------------------------------------------------------------------------------------------------------------------------------------------------------------------------------------------------------------------------------------------------------------------------------------------------------------------------------------------------------------------------------------------------------------------------------------------------------------------------|
| Definitions of opioids                       | <p>"It's a pain medication, and they all have like a certain like chemical structure, right?" – P3, FG2</p> <p>"I guess, okay, well, opioids are like a substance that like often can help you control pain, but they can be like highly addictive and mind altering, depending on if, like when you take them, how much and what sort of situation you're in." – P3, FG4</p> <p>"I feel like it's a pill that kind of helps out with your physical type body, in a way." – P4, FG7</p> <p>"It's like medication/drug." – P1, FG8</p>                                                                                                                                                                                                                                                                                                                                                                |
| Examples of opioids                          | <p>"Xanax, are those opioids?" – P1, FG3</p> <p>"Oh, okay. Are, Percocets, is that something? I just listen to rap music, so it's just like ..." – P5, FG3</p> <p>"Amoxicillin." – P1, FG7</p> <p>"I know one. Sleeping pills?" – P4, FG8</p>                                                                                                                                                                                                                                                                                                                                                                                                                                                                                                                                                                                                                                                        |
| Examples of opioid misuse                    | <p>"Going to your doctor and lying, saying you have pain, but you don't have pain, to get another refill." – P7, FG1</p> <p>"Overusing them too much, taking them more than what the recommended amount is." – P3, FG3</p> <p>"I feel like misuse could also be like keeping it past your prescription day. Like that's not abusing it at all, because you're not using it, but I feel like it's definitely misusing, because you're not using it for the express purpose of what you were given it for." – P1, FG4</p> <p>"Using it for no reason, like just taking it ... just taking it just to feel the high that it gives you, like something that ..." – P1, FG7</p>                                                                                                                                                                                                                           |
| Disposal and storage of prescription opioids | <p>"Putting like, well, I guess it's not misuse, but like putting it somewhere where somebody can get it I guess. I don't know ..." – P3, FG1</p> <p>"... yeah, never thought to put a lock on it, just hide it." – P3, FG3</p> <p>"Like my dad tried to flush his down the toilet, and my mom is like you can't do that. You have to like dispose of them this way. So like we're really aware of that, but honestly, I feel like if you don't have someone in your family that is in the medical profession, you are like 95 times more likely to not know what you're doing, what you should do." – P3, FG4</p> <p>"I'm sure like at least 50% of medications go in the trashcan." – P5, FG4</p>                                                                                                                                                                                                  |
| Sharing medications with family              | <p>"Giving someone else." – P4, FG2</p> <p>"Like my parents knew that this is the exact prescription, because they had been there when the surgeon and the doctors were there. So they knew that they were giving me like a prescription that was like exactly the same as what I would be getting. So I wasn't getting like weird medication or some like over-the-top medication that was going to like throw me into a different spiral or give me wrongfully prescribed medication." – P1, FG4</p> <p>"I got one for my, Oxy for my wisdom teeth. And I took it the first night because I was just in so much pain. And they gave us so many medications that the next day my dad thought that he was giving me ibuprofen. But instead, he gave me a double dose of Oxy. But I'm good now. I'm not addicted. We're good." – P4, FG4</p> <p>"Yeah, like giving it to other people." – P2, FG5</p> |

FG, focus group; P, participant
