# Supplementary material
Source: PubMed Central journal article supplement (PMC7887877)
Supplement: JPPT_26_2_Abraham_S_Table_2.pdf [file JPPT_26_2_Abraham_S_Table_2.pdf]

**Table S2.** Theme 2: Prevalence of Prescription Opioid Misuse

| <b>Subthemes</b>            | <b>Verbatim Examples</b>                                                                                                                                                                                                                                                                                                                                                                                                                                                                                                                                                                                                                                                                                                                                                 |
|-----------------------------|--------------------------------------------------------------------------------------------------------------------------------------------------------------------------------------------------------------------------------------------------------------------------------------------------------------------------------------------------------------------------------------------------------------------------------------------------------------------------------------------------------------------------------------------------------------------------------------------------------------------------------------------------------------------------------------------------------------------------------------------------------------------------|
| Limited personal experience | <p>“Probably. I don’t know of anybody.” –P4, FG2</p> <p>“I’m sure almost everyone, almost a lot of people, no, like whoever you are like age or stuff, but, yeah, I think teens would definitely misuse that.” – P1, FG3</p> <p>“And also like I don’t know about everybody else, but like I’m probably pretty sheltered. Like I’ve never drank before, so like I don’t get invited to like the parties where this stuff is going on. So I’m like I probably don’t know, and I kind of like, like ignorance is bliss, I guess. Like so I’m not seeing it, I guess.” – P1, FG4</p> <p>“I feel like it’s more hidden.” – P5, FG4</p>                                                                                                                                       |
| Regional experiences        | <p>“I mean, hey, you hear about it like all the time on like news and media and such that everywhere, yeah, everybody everywhere is like misusing them, sorry, can’t talk today.” – P1, FG3</p> <p>“I feel like it just doesn’t happen as much around here ...” –P1, FG4</p> <p>“I feel like people, teens [misuse prescription opioids], just maybe not in our location or frequently as ...” – P5, FG4</p> <p>“Yeah, I think they misuse them, but I think that there’s other things that are more common and easier to come by.” – P3, FG4</p>                                                                                                                                                                                                                        |
| Teen substance misuse       | <p>“Teens misuse everything ...” – P5, FG2</p> <p>“Like we see a lot of weed and ‘shrooms and alcohol, but not, I feel like it’s hard, because we don’t see a lot of it around here.” – P1, FG4</p> <p>“Yeah, the like, it was just like a bunch of smoking and a bunch of drinking .... But like from what I saw, not behind like the locked doors and stuff, but like it was like all alcohol and all smoking.” – P2, FG4</p> <p>“I think that it’s just less prevalent, because like prescribed drugs are really like controlled. So like when there is like an extra, like someone decides to sell, there’s only going to be a few pills in it. So it’s not like it doesn’t happen. It just doesn’t happen as often as like alcohol, because it’s ...” – P2, FG4</p> |

*FG, focus group; P, participant*
